# Supplementary material for: PtCu/Pt core/atomic-layer shell hollow octahedra for oxygen reduction and methanol oxidation electrocatalysis
Source: Royal Society of Chemistry journal article supplement (doi:10.1039/d4cc00030g), 2024-01-01
Supplement: d4cc00030g1.pdf [file d4cc00030g1.pdf]

**PtCu/Pt core/atomic-layer shell hollow octahedra for oxygen**

**reduction and methanol oxidation electrocatalysis †**

**Yi Zhou, Qiang Yuan\***

## Experimental section

### Chemicals

Platinum (II) acetylacetonate ( $\text{Pt}(\text{acac})_2$ , 97%), copper (II) acetylacetonate ( $\text{Cu}(\text{acac})_2$ , 97%), and cobalt (II) acetylacetonate ( $\text{Co}(\text{acac})_2$ , 97%) were purchased from Sigma-Aldrich. Ascorbic acid (AA, 99.7%) was obtained from Kermel. Dodecyltrimethylammonium bromide (99%) and N, N-dimethylformamide (DMF, 99.8%) were obtained from Aladdin. Nitric acid ( $\text{HNO}_3$ , 65-68%) was purchased from Sinopharm Chemical Reagent Co. Ltd. (Shanghai, China). Pt/C (20 wt%) was purchased from Johnson Matthey. Vulcan XC-72 was purchased from Cabot. All chemicals were used as received without further purification treatment.

### Synthesis of S-PtCuCo OHs:

In a typical synthesis, 4.0 mg  $\text{Pt}(\text{acac})_2$ , 20 mg AA and 28 mg dodecyl trimethyl ammonium bromide was dissolved in 12 mL Teflonlined autoclave containing 4.9 mL DMF. Then, adding 2 mL 0.25 M  $\text{Cu}(\text{acac})_2$  (dissolved in DMF) and 0.1 mL 0.1 M  $\text{Co}(\text{acac})_2$  (dissolved in DMF) in the mixed solution. The resulting mixture was magnetically stirred at room temperature for 20 min and heated at 180 °C for 24 hours. The as obtained product was centrifuged three times at 10000 rpm for 20 min with ethanol, and the final product was stored in 5 mL ethanol solution.

### Synthesis of S-PtCu OHs:

4.0 mg  $\text{Pt}(\text{acac})_2$ , 20 mg AA and 28 mg dodecyl trimethyl ammonium bromide was dissolved in 12 mL Teflonlined autoclave containing 4.9 mL DMF. Adding 1.5 mL 0.25 M  $\text{Cu}(\text{acac})_2$  (dissolved in DMF) in the mixed solution. The resulting mixture was magnetically stirred at room temperature for 20 min and heated at 180 °C for 24 hours. The as obtained product was centrifuged three times at 10000 rpm for 20 min with ethanol, and the final product was stored in 5 mL ethanol solution.

### Synthesis of H-PtCu/Pt<sub>L</sub> OHs

The S-PtCuCo OHs solution (1 mL) was added to a 3-neck flask containing 5 mL DMF and ultrasonic mixed for 1 min, At the same time, 40  $\mu\text{L}$  of concentrated

HNO<sub>3</sub> solution were rapidly added to the obtained mixture and heated continuously heated for 40 min under magnetic stirring at 70 °C. The as obtained product was centrifuged three times at 10000 rpm for 15 min with ethanol, then dispersed in 2 mL ethanol.

## Structural characterization

The shape and size of samples were analysed by transmission electron microscope (TEM; JEM-1400 Flash at 120KV) and high-angle annular dark-field scanning TEM (HAADF-STEM; FEI Tecnai G2 F20 S-Twin HRTEM operating at 200 kV). The inductively coupled plasma optical emission spectrometry (ICP-OES) (Thermo Fisher Scientific, iCAP 7200) was used to analyze composition of samples. The X-ray diffraction (XRD) patterns of the samples were recorded on a Bruker D8 Advance X-ray powder diffractometer with Cu K $\alpha$  radiation ( $\lambda=1.5418$  Å) and graphite monochromator (40 KV, 40 mA). X-ray photoelectron spectroscopy (XPS) measurements were performed using AlK $\alpha$  X-ray radiation (1486.6 eV) for excitation at 150 W (Thermo Fisher Scientific, USA).

## Estimation of the alloy extent from XRD

The alloy extent is estimated by the variation of the lattice constant  $a/a_0$ . The alloy extent  $x$  can be obtained by the following equation:

$$\frac{x(1 - r_{\text{Cu}})}{r_{\text{Pt}}} = 1 - \frac{a}{a_0}$$

Where  $r_{\text{Cu}}$  and  $r_{\text{Pt}}$  are the atomic radius of Cu and Pt, respectively,  $a$  is the lattice constant of the catalyst, and  $a_0$  is the lattice constant of pure Pt (that is, 3.923 Å; JCPDS no. 04-0802).

## The computing method of d-band centers

The d-band centers of corresponding Pt nanocrystal and commercial Pt black were calculated from the following equation based on the valence band spectra:

$$\text{d - band center} = - \int_{-1\text{eV}}^{8\text{eV}} [\text{binding energy}(E)\text{intensity}(E)]/\text{intensity}(E)dE$$

## Electrochemical In Situ FTIR Spectra Measurements

The measurement of electrochemical in situ Fourier transform infrared (in situ FTIR) reflection spectroscopy was conducted on a Nicolet-iS50 FT-IR spectrometer containing a liquid-nitrogen-cooled MCT-A detector, at a spectral resolution of  $8\text{ cm}^{-1}$ . The species (absorbed and dissolved) were measured on a thin layer ( $<10\text{ }\mu\text{m}$ ) toward the working electrode and  $\text{CaF}_2$  window for in situ FTIR. Multi-stepped FTIR spectroscopy (MS-FTIR) was utilized to collect spectra in  $0.1\text{ M HClO}_4 + 0.5\text{ M CH}_3\text{OH}$  electrolyte from  $0.09$  to  $1.19\text{ V}$  (vs. RHE) at  $0.1\text{ V}$  intervals. The relative change in reflectivity ( $\Delta R/R$ ) of spectra was calculated by the following equation:

$$\Delta R/R = (R(E_S) - R(E_R)) / R(E_R)$$

Where  $R(E_S)$  and  $R(E_R)$  are single-beam spectra collected at the sample potential  $E_S$  and reference potential  $E_R$ .

## Measurements of ORR performance

Electrochemical experiments were carried out in a standard three-electrode cell at room temperature controlled by CHI 760E electrochemical analyzer (CHI Instruments, Shanghai, Chenhua Co. Ltd.). The super pure water ( $18.25\text{ M}\Omega\text{ cm}$ ) purified through a Milli-Q Lab system (Nihon Millipore Ltd.) was used as solvent. The working electrode is a glassy carbon (GC,  $\Phi=5\text{ mm}$ ,  $0.196\text{ cm}^2$ ) electrode embedded into a Teflon holder. Before the electrochemical test, the GC electrode was mechanically polished using successively alumina powder of size  $1.5$ ,  $1.0$  and  $0.05\text{ }\mu\text{m}$ , and use ultrapure water cleaned in an ultrasonic bath. The suspension of catalysts was spread on the GC electrode. The Pt loading on the GC electrode of Pt/C, H-PtCu/Pt<sub>L</sub> OHs/C were  $7.66\text{ }\mu\text{g cm}^{-2}$ ,  $7.5\text{ }\mu\text{g cm}^{-2}$ . As soon as the electrode was dried under infrared lamp,  $2.5\text{ }\mu\text{L}$  Nafion solution ( $0.1\text{ wt \%}$ ) was coated onto the electrode surface. The cyclic voltammograms (CVs) were obtained in nitrogen-saturated  $0.1\text{ M HClO}_4$  solution, and the potential was scanned from  $0.04$  to  $1.19\text{ V}$  (vs. RHE.) at a scan rate of  $50\text{ mV s}^{-1}$ . Electrochemical experiments of ORR were performed using a glassy carbon

rotating disk electrode (RDE) (PINE, USA). An Ag/AgCl electrode and a graphite rod were used as the reference and counter electrode, respectively. The ORR measurements were conducted at room temperature in 0.1 M HClO<sub>4</sub> solutions after a flow of O<sub>2</sub> for a half hour until saturated, then using a glassy carbon RDE at a rotation rate of 1600 rpm with a scan rate of 10 mV s<sup>-1</sup>. The accelerated durability tests were carried out in O<sub>2</sub>-saturated 0.1 M HClO<sub>4</sub> solution by applying cyclic potential sweeps between 0.6 and 1.1 V (vs. RHE) at a sweep rate of 100 mV s<sup>-1</sup>.

### **Rotating ring-disk electrode (RRDE) voltammetry**

For the RRDE measurements, an RRDE with glassy carbon as the disk electrode (d=5.61 mm) and Pt as the ring electrode (Pine, collection efficiency=37%) was used as the working electrode. An Ag/AgCl electrode and a graphite rod were used as the reference and counter electrode. The disk electrode was scanned in the same potential range as the RDE measurement at a rate of 10 mV s<sup>-1</sup>. The fraction of HO<sub>2</sub><sup>-</sup> formed during the ORR was determined by the following equation:

$$H_2O_2 = \frac{200 (I_D)}{(I_D N + I_R)}$$

where I<sub>D</sub> is the disk current, I<sub>R</sub> is the ring current and N is the collection efficiency of the Pt ring. Accordingly, we can also deduce the electron transfer number (n) of ORR over different catalysts:

$$n = \frac{4I_D}{(I_D + I_R N)}$$

### **The computing method of ECSA**

The ECSA of H-PtCu/Pt<sub>L</sub> OHs/C, S-PtCu OHs and commercial Pt/C were calculated by the following equation:

$$ECSA = Q_H / (210 \times Pt_m)$$

Q<sub>H</sub> is the charge for Hupd adsorption determined using Q<sub>H</sub> = 0.5×Q, Pt<sub>m</sub> is associated with the loading of Pt on the work electrode, and 210 μC cm<sup>-2</sup> is the charge required for the monolayer adsorption of hydrogen on the Pt surface.

## **CO stripping test**

All samples were carried out firstly in the N<sub>2</sub>-saturated 0.1 M HClO<sub>4</sub> solution to test from 0.04 to 1.19 V (vs. RHE) at a scan rate of 50 mV s<sup>-1</sup>, then input CO until saturation and recorded the CO-stripping CVs.

## **Methanol Oxidation Reaction (MOR) performance**

CV curves were recorded in the N<sub>2</sub>-saturated 0.1 M HClO<sub>4</sub> solution or 0.1 M HClO<sub>4</sub> + 0.5 M CH<sub>3</sub>OH solution, an Ag/AgCl electrode and a graphite rod were used as the reference counter electrode, respectively. The suspension of catalysts was spread on the GC electrode. And the potential was scanned from 0.04 to 1.19 V (vs. RHE) at a scan rate of 50 mV s<sup>-1</sup>. Later, the current–time (j-t) test was performed at 0.1 V for 3600 s.

## **DMPEMFCs test**

The catalyst inks ((both anode and cathode) were made by mixing the 12.8 mg H-PtCu/Pt<sub>L</sub> OHs/C with 500 μL water, 2.5 mL isopropanol, and 100 μL 5% Nafion solution. After sonication for 45 min, half of the ink was sprayed on the carbon paper (AvCard GDS2240, 1×1 cm<sup>2</sup>) to obtain the cathode catalyst layer and the other half of the ink was dripped on the foam nickel (1×1 cm<sup>2</sup>) for the anode catalyst layer. The precious metal (Pt) loading of the cathode and anode is 2 mg cm<sup>-2</sup>, respectively. For comparison, commercial Pt/C (60 wt%) prepared cathode and anode catalysts under the same conditions. The proton exchange membrane (Nafion N115) was first immersed in 3 % H<sub>2</sub>O<sub>2</sub> at 70 °C for 1 hour, then immersed in water for 2 hours, and finally immersed in 0.5 M H<sub>2</sub>SO<sub>4</sub> solution for 2 hours, and stored in water at room temperature. Then, the anode catalyst layer, proton exchange membrane, and cathode catalyst layer were sandwiched using hotpressing at 70 °C and 1 MPa for 60 s. The polarization curves were measured using the fuel cell test system (850e, Scribner Associates Inc.). The anode fuel was 0.5 M H<sub>2</sub>SO<sub>4</sub> + 1 M CH<sub>3</sub>OH solution with an injection rate of 2 mL min<sup>-1</sup>, the cathode gas was O<sub>2</sub>, and the flow rate was 250 mL min<sup>-1</sup>. The performance of the battery was carried out at 70 °C.

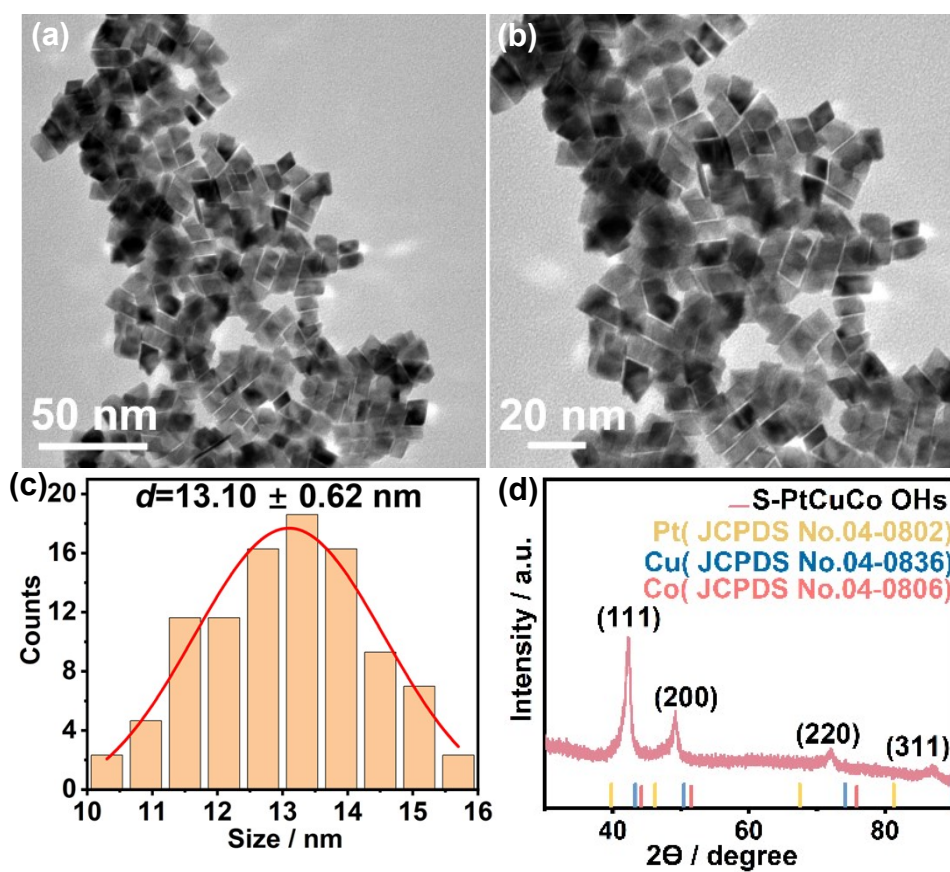

**Fig.S1** (a, b) TEM images of alloyed S-PtCuCo OHs. (c) The column chart size of S-PtCuCo OHs.

(d) XRD spectra of S-PtCuCo OHs.

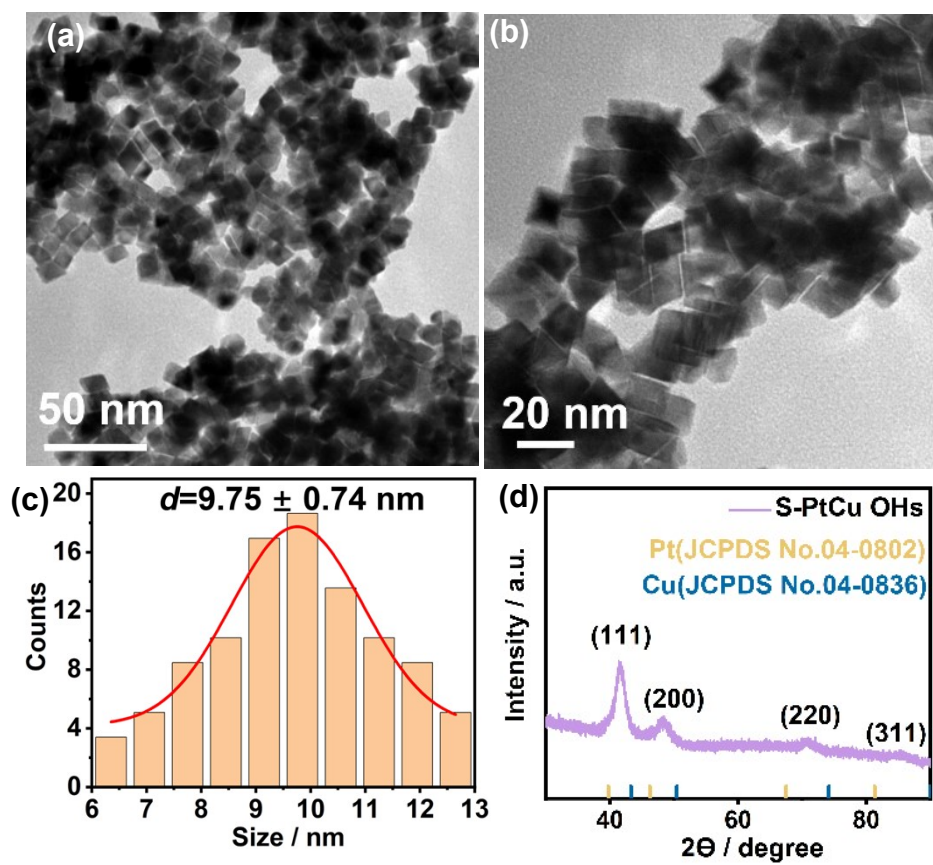

**Fig. S2** (a, b) TEM images of alloyed S-PtCu OHs. (c) The column chart size of S-PtCu OHs. (d) XRD spectra of S-PtCu OHs.

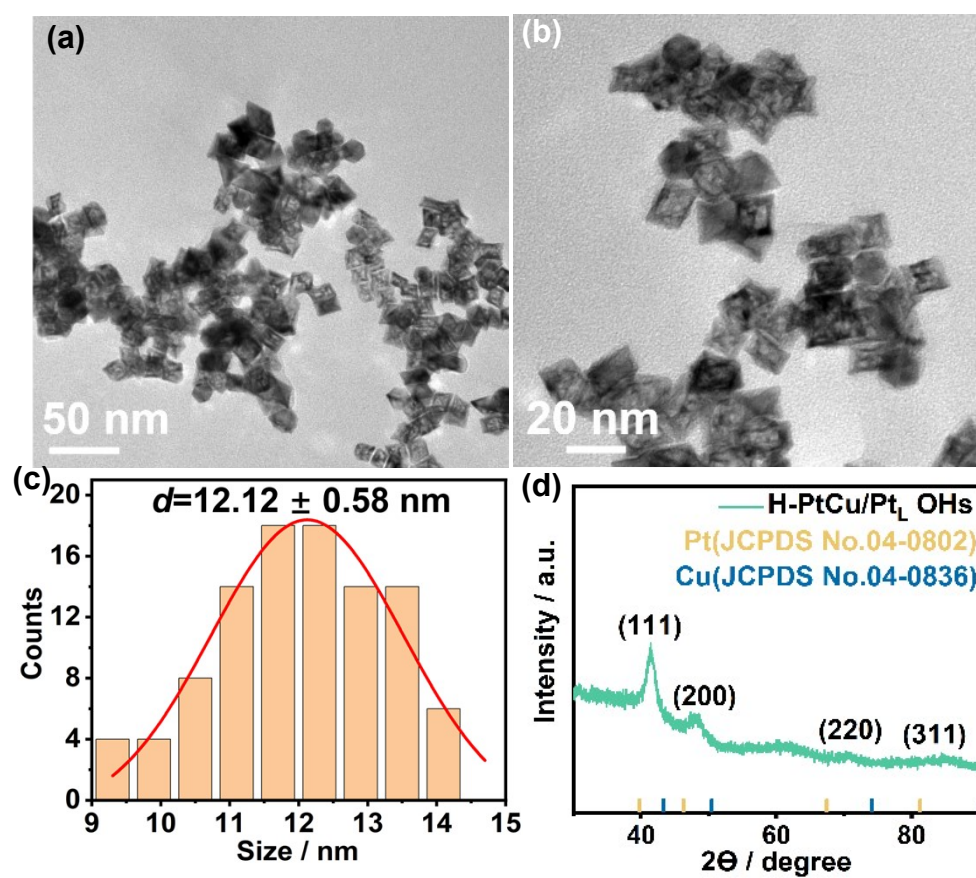

**Fig. S3** (a, b) TEM images of H-PtCu/Pt<sub>L</sub> OHs. (c) The column chart size of H-PtCu/Pt<sub>L</sub> OHs. (d) XRD spectra of H-PtCu/Pt<sub>L</sub> OHs.

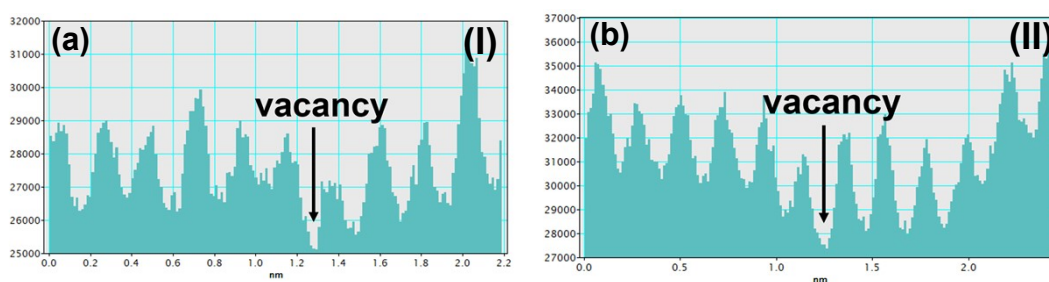

**Fig. S4** (a) and (b) correspond to the atomic strength signal of I and II in Fig. 2c, respectively.

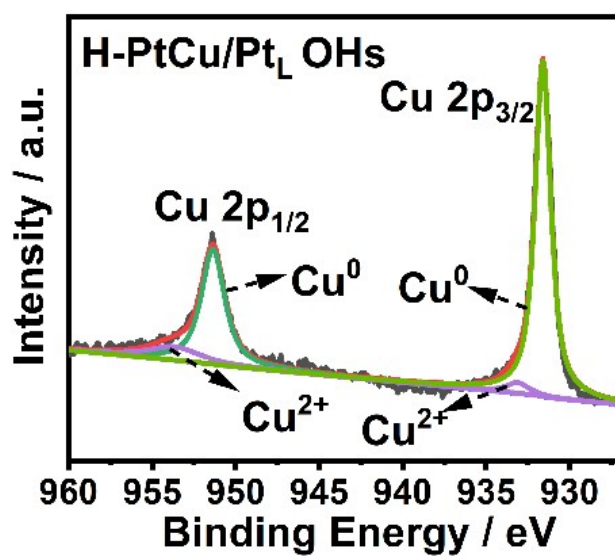

**Fig. S5** XPS spectra Cu 2p of H-PtCu/Pt<sub>L</sub> OHs.

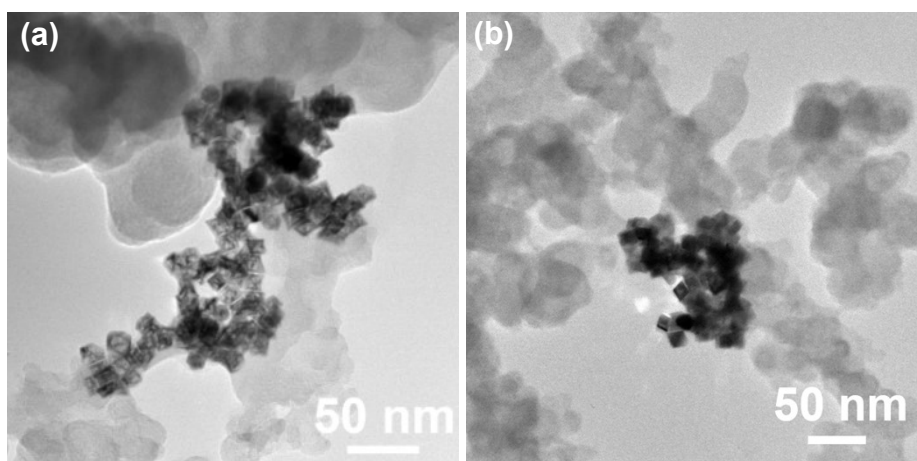

**Fig. S6** (a) TEM images of H-PtCu/Pt<sub>L</sub> OHs/C. (b) TEM images of S-PtCu OHs/C.

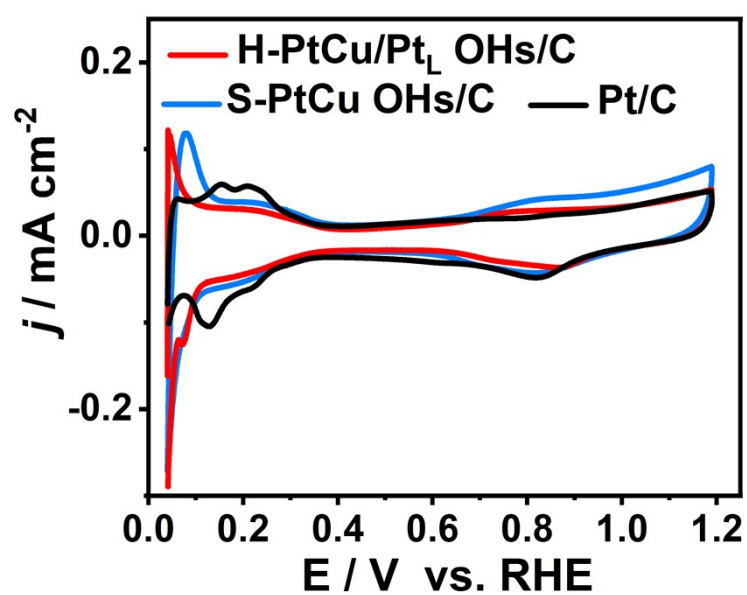

Fig. S7 CV curves of H-PtCu/Pt<sub>L</sub> OHs/C, S-PtCu OHs/C and Pt/C.

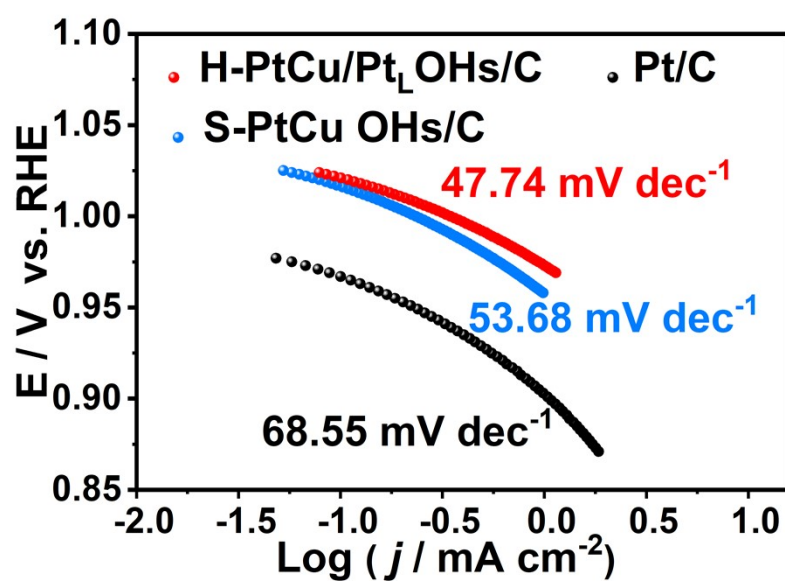

**Fig. S8** The Tafel slope plots.

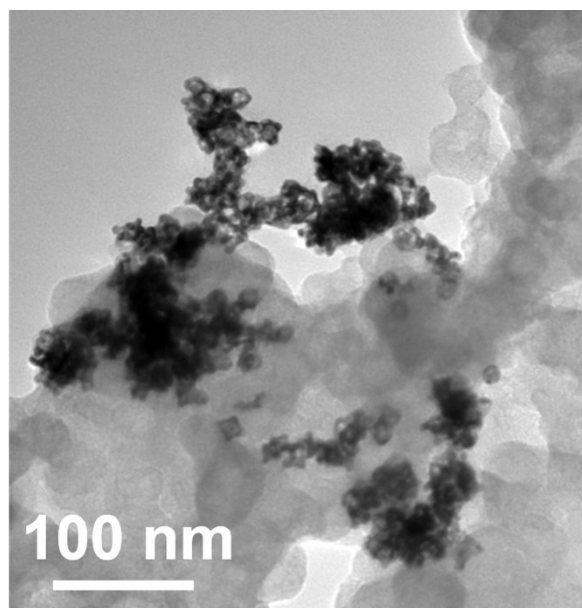

**Fig. S9** TEM image of H-PtCu/Pt<sub>L</sub> OHs/C after 20K ADT.

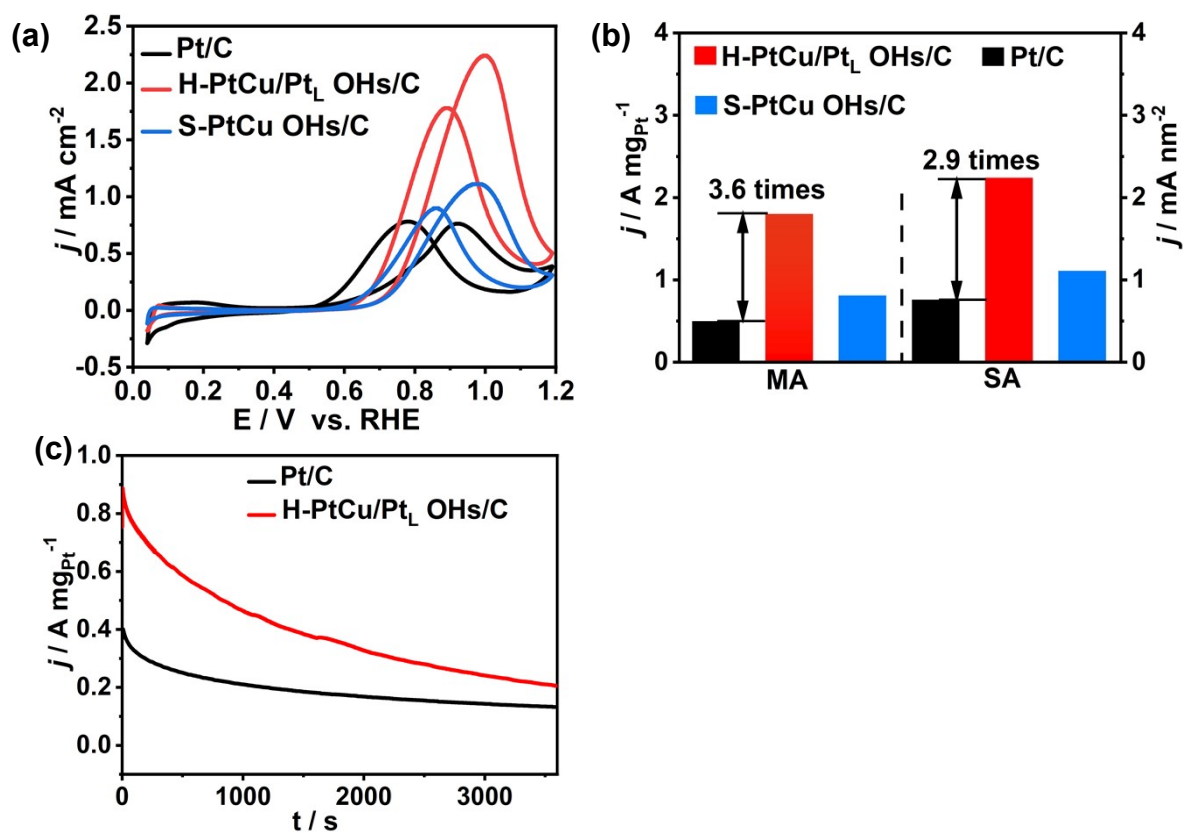

**Fig. S10** (a) CV of the MOR specific activity. (b) Histogram of MA and SA. (b) j-t curves measured at 0.84 V for 3600 s.

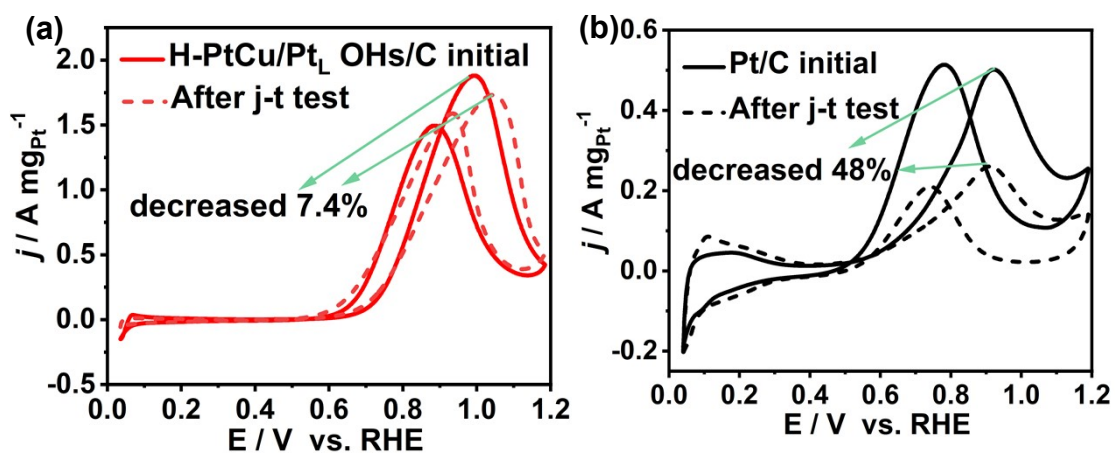

**Fig. S11** MOR of (a) H-PtCu/PtL OHs/C, and (b) Pt/C before and after j-t.

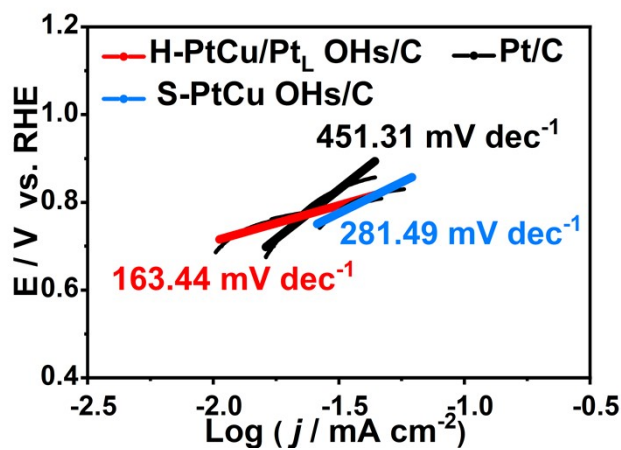

**Fig. S12** The Tafel slope diagram of CO stripping.

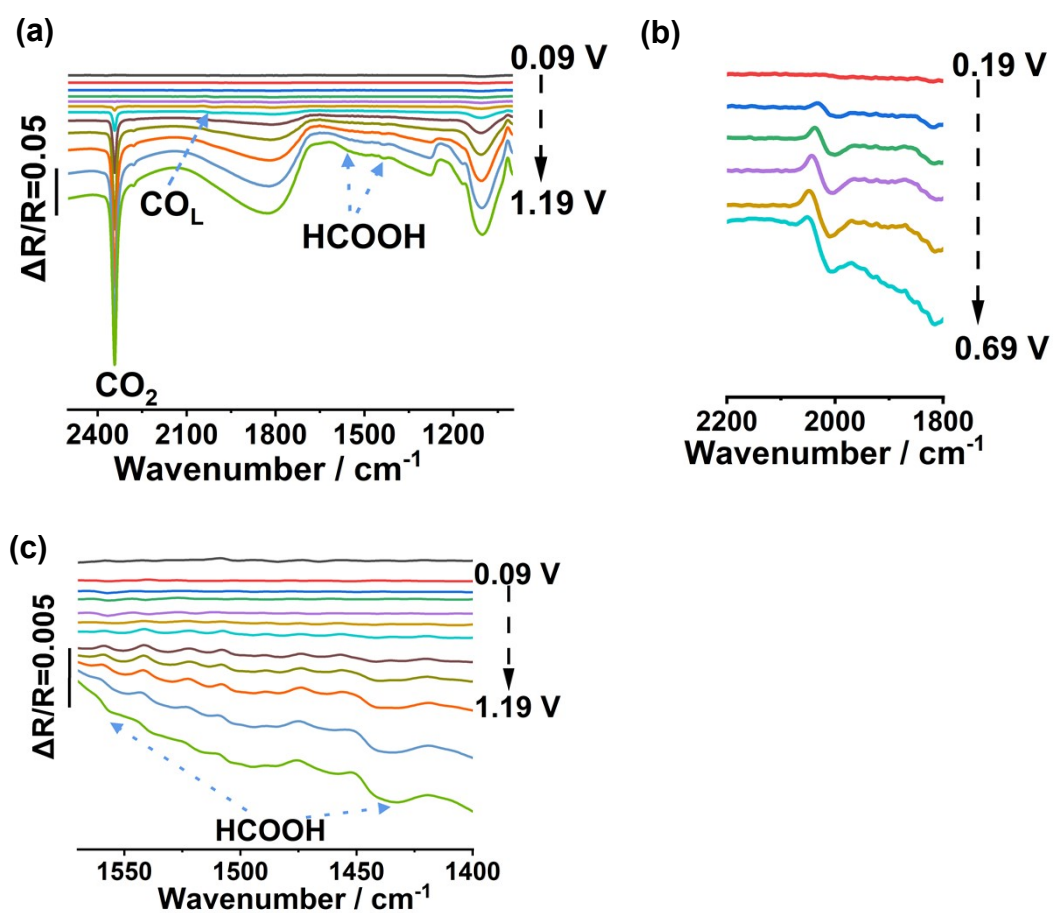

**Fig. S13** In situ FTIR spectra of H-PtCu/Pt<sub>L</sub> OHs/C: (a) In situ FTIR total spectrum; (b) CO<sub>L</sub>; (c) HCOOH.

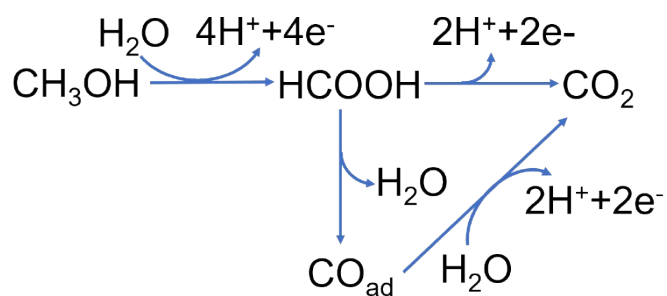

**Fig. S14** The Methanol oxidation reaction mechanism diagram of H-PtCu/Pt<sub>L</sub> OHs/C.

**Table S1.** XRD results of H-PtCu/Pt<sub>L</sub> OHs and S-PtCu OHs samples.

| Catalysts                     | 2 $\theta$ /degree<br>(111) | d <sub>(111)</sub> spacing<br>(nm) | Lattice parameter<br>(Å) | alloy extent (%) |
|-------------------------------|-----------------------------|------------------------------------|--------------------------|------------------|
| H-PtCu/Pt <sub>L</sub><br>OHs | 41.59                       | 0.217                              | 0.376                    | 51.58            |
| S-PtCu OHs                    | 41.66                       | 0.216                              | 0.375                    | 54.80            |
| Pt (JCPDS<br>No.04-<br>0802)  | 39.80                       | 0.226                              | 0.392                    |                  |

**Table S2.** Compositional analysis of as-prepared catalysts by ICP-OES measurements and XPS spectra measurements

| Catalyst                      | Pt<br>Atomic (%)<br>(results from<br>ICP-OES) | Cu<br>Atomic (%)<br>(results from<br>ICP-OES) | Pt<br>Atomic (%)<br>(results from<br>XPS spectra) | Cu<br>Atomic (%)<br>(results from<br>XPS spectra) |
|-------------------------------|-----------------------------------------------|-----------------------------------------------|---------------------------------------------------|---------------------------------------------------|
| H-PtCu/Pt <sub>L</sub><br>OHs | 52                                            | 48                                            | 65.7                                              | 34.3                                              |

**Table S3.** Comparison of ORR catalytic activity at 0.9 V vs. RHE potential in 0.1 M HClO<sub>4</sub> electrolyte with catalysts reported in the literature

| Catalysts                                | MA (A mg <sub>Pt</sub> <sup>-1</sup> ) | SA (mA cm <sup>-2</sup> ) | References |
|------------------------------------------|----------------------------------------|---------------------------|------------|
| H-PtCu/Pt <sub>L</sub> OHs/C             | 1.89                                   | 2.46                      | This work  |
| PtCuNi/C                                 | 0.36                                   | 0.71                      | 1          |
| Pt <sub>2</sub> Cu/C                     | 0.51                                   | -                         | 2          |
| PtCu NPs                                 | 0.92                                   | 1.94                      | 3          |
| PtCu NFs                                 | 0.82                                   | 1.24                      | 4          |
| Int-PtCuN/KB                             | 1.15                                   | 1.18                      | 5          |
| Pd <sub>2</sub> Cu@Pt/C                  | 0.678                                  | 1.923                     | 6          |
| Mo <sub>0.02</sub> -PtCu/C               | 1.61                                   | 2.84                      | 7          |
| PtCu <sub>3</sub> Au <sub>0.5</sub> NWP  | 1.422                                  | 1.662                     | 8          |
| PtCu <sub>3</sub> @Pt <sub>3</sub> Cu@Pt | 1.55                                   | 2.4                       | 9          |
| Pt <sub>3</sub> Cu <sub>97</sub>         | 1.85                                   | 5.78                      | 10         |
| Pd@PtCu/C                                | 0.7                                    | -                         | 11         |
| Pt <sub>76</sub> Cu <sub>24</sub>        | 0.466                                  | 1.273                     | 12         |

|                         |      |      |    |
|-------------------------|------|------|----|
| Pd@Pt <sub>1L</sub> /C  | 0.75 | 1.01 | 13 |
| Pt octahedral nanocages | 0.75 | 1.98 | 14 |

---

## References

1. B. Li, Y. Ren, C. Lv, F. Gao, X. Zhang, X. Yang, L. Li, Z. Lu, X. Yu, *Int. J. Hydrogen Energ.*, 2023, **48**, 16286-16293.
2. X. Zhang, Z. An, Z. Xia, H. Li, X. Xu, S. Yu, S. Wang, G. Sun, *Appl. Surf. Sci.* 2023, **619**, 156663.
3. M. Sun, S. Gong, Z. Li, H. Huang, Y. Chen, Z. Niu, *ACS Nano*. 2023, **17**, 19421-19430.
4. M. Gong, D. Xiao, Z. Deng, R. Zhang, W. Xia, T. Zhao, X. Liu, T. Shen, Y. Hu, Y. Lu, X. Zhao, H. Xin, D. Wang, *Appl. Catal. B.*, 2021, **282**, 119617.
5. X. Zhao, H. Cheng, L. Song, L. Han, R. Zhang, G. Kwon, L. Ma, S. Ehrlich, A. Frenkel, J. Yang, K. Sasaki, H. Xin, *ACS Catal.*, 2020, **11**, 184-192.
6. W. Shi, A. Park, Y. Kwon, *Electroanal. Chem.*, 2022, **918**, 116451.
7. F. Wang, X. Wang, Z. Guo, J. Yu, H. Zhu, *Energy Fuels*, 2021, **35**, 3368-3375.
8. S. Zhang, H. Zhou, X. Liu, P. Tan, H. Liu, J. Pan, *J. Power Sources*, 2023, **567**, 232924.
9. Y. Liao, J. Li, S. Zhang, S. Chen, *Chinese J. Catal.*, 2021, **42**, 1108-1116.
10. M. Gatalo, F. Ruiz-Zepeda, N. Hodnik, G. Dražić, M. Bele, M. Gaberšček, *Nano Energy*, 2019, **63**, 103892.
11. G. Sievers, J. Bowen, V. Brüser, M. Arenz, *J. Power Sources*, 2019, **413**, 432-440.
12. M. Bao, I. Amiin, T. Peng, W. Li, S. Liu, Z. Wang, Z. Pu, D. He, Y. Xiong, S. Mu, *ACS Energy Lett.*, 2018, **3**, 940-945.
13. M. Zhou, H. Wang, A. Elnabawy, Z. Hood, M. Chi, P. Xiao, Y. Zhang, M. Mavrikakis, Y. Xia, *Chem. Mater.*, 2019, **31**, 1370-1380.
14. L. Zhang, L. Roling, X. Wang, M. Vara, M. Chi, J. Liu, S. Choi, J. Park, J. Herron, Z. Xie, M. Mavrikakis, Y. Xia, *Science*, 2015, **349**, 412-416.
